# Supplementary material for: Ceria nanoparticles ameliorate renal fibrosis by modulating the balance between oxidative phosphorylation and aerobic glycolysis
Source: PubMed Central journal article supplement (PMC8725394; doi:10.1186/s12951-021-01122-w), 2022-01-04
Supplement: 12951_2021_1122_MOESM1_ESM.pdf [file 12951_2021_1122_MOESM1_ESM.pdf]

# Ceria nanoparticles ameliorate renal fibrosis by modulating the balance between oxidative phosphorylation and aerobic glycolysis

Mengling Wang *et al.*

## Additional figures

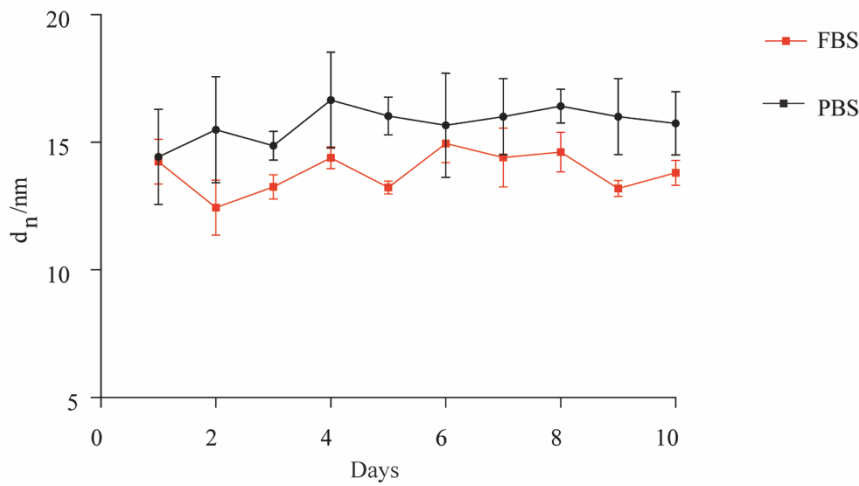

**Figure S1. Measurement of the colloidal stability of CeNP-PEG.** The hydrodynamic diameters of CeNP-PEG in RPMI1640 medium containing 10% FBS or PBS at different time points ( $n = 3$  independent experiments).

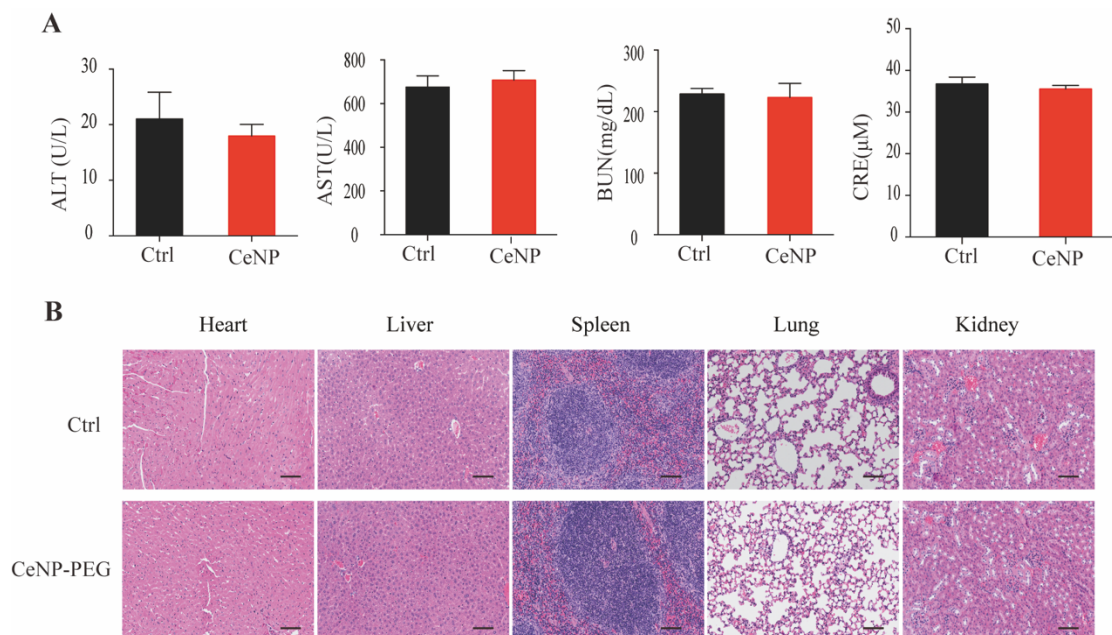

**Figure S2. The CeNP-PEG had negligible toxicity in primary organs.** (A) The blood analysis of BUN, CRE, ALT and AST. (B) The H&E sections of heart, liver, spleen, lung and kidney after treatment with CeNP-PEG (10 mg/kg) or saline for 21 days. *n* = 3 independent animals.

**Table S1. RT-qPCR primer sequences.**

| genes          | F                      | R                      | Species |
|----------------|------------------------|------------------------|---------|
| $\alpha$ -SMA  | TGCTGACAGAGGCACCACTGAA | CAGTTGTACGTCCAGAAGGC   | Mouse   |
| FN             | ACTGTACTTCTGAGGGTCGC   | ACTTGGTGATGTGTGAAGGC   | Mouse   |
| COL1           | CCTCGGGTATTGCTGGACAAC  | CAGAAGGACCTTGTTTGCCAGG | Mouse   |
| HK2            | TACCACACACCCTACAGCAG   | CTCGGGAATGGCGTAGATCT   | Mouse   |
| PFKB           | GTCAGAGTGGAGCGACTTG    | TGCCACAGAAGTCATTGTCTG  | Mouse   |
| PKM2           | GCTCTAGGTATCGCAGCAGG   | GTAAGCGTTGTCCAGGGTGA   | Mouse   |
| $\beta$ -actin | CATTGCGACAGGATGCAGAAGG | TGCTGGAAGGTGGACAGTGAGG | Mouse   |
